# Supplementary material for: Association between glucose-to-lymphocyte ratio and in-hospital mortality in intensive care patients with sepsis: A retrospective observational study based on Medical Information Mart for Intensive Care IV
Source: PubMed Central journal article supplement (PMC9448903; doi:10.3389/fmed.2022.922280), 2022-08-24
Supplement: Table_1.pdf [file Table_1.pdf]

TABLE S1 | Sensitivity analysis of patients after excluding missing data from the study.

| Variable                | n    | Unadjusted       |         | Model 1            |         | Model 2          |         | Model 3            |         |
|-------------------------|------|------------------|---------|--------------------|---------|------------------|---------|--------------------|---------|
|                         |      | HR_95CI%         | P-value | HR_95CI%           | P-value | HR_95CI%         | P-value | HR_95CI%           | P-value |
| GLR                     | 7756 | 1.11 (1.09~1.13) | <0.001  | 1.125 (1.09~1.13)  | <0.001  | 1.06 (1.04~1.08) | <0.001  | 1.03 (1.0~1.05)    | 0.020   |
| GLR4                    |      |                  |         |                    |         |                  |         |                    |         |
| Q1(GLR<0.43)            | 1867 | 1(Ref)           |         | 1(Ref)             |         | 1(Ref)           |         | 1(Ref)             |         |
| Q2(0.43≤GLR<0.78)       | 1964 | 1.23 (1.01~1.48) | 0.036   | 1.23 (1.019~1.487) | 0.031   | 1.24 (1.03~1.5)  | 0.027   | 1.19 (0.98~1.44)   | 0.074   |
| Q3(0.78≤GLR<1.56)       | 1911 | 1.72 (1.45~2.05) | <0.001  | 1.70 (1.43~2.02)   | <0.001  | 1.49 (1.25~1.78) | <0.001  | 1.306 (1.094~1.56) | 0.003   |
| Q4(GLR ≥1.56)           | 2014 | 2.41 (2.04~2.85) | <0.001  | 2.34 (1.98~2.76)   | <0.001  | 1.74 (1.47~2.07) | <0.001  | 1.396 (1.17~1.66)  | <0.001  |
| <i>P</i> for trend.test |      |                  | <0.001  |                    | <0.001  |                  | <0.001  |                    | <0.001  |

Model 1 = Adjust for (Age+ sex)

Model 2 = Model 1+ (ethnicity +weight + MAP + HR +SPO2+ hemoglobin + PLT + WBC + lactate + pH).

Model 3 = Model 2+ (SOFA score+ APS III + ventilator use+ diabetes +CCI+ vasopressin use).
